# Supplementary material for: The experience of living with adolescent idiopathic scoliosis: a qualitative evidence synthesis using meta-ethnography
Source: Springer Nature journal article supplement (doi:10.1186/s12887-023-04183-y), 2023-07-22
Supplement: MOESM1 [file 25834594]

# Experiences of people living with AIS

## Summary of Qualitative Findings Table

### Review question

What are the experiences of people living with adolescent-onset idiopathic scoliosis?

| # | Summarised review finding                                                                                                                         | GRADE-CERQual Assessment of confidence | Explanation of GRADE-CERQual Assessment                                                                                                                                            | References                                                                                                                                                                              |
|---|---------------------------------------------------------------------------------------------------------------------------------------------------|----------------------------------------|------------------------------------------------------------------------------------------------------------------------------------------------------------------------------------|-----------------------------------------------------------------------------------------------------------------------------------------------------------------------------------------|
| 1 | Diagnosis of scoliosis turned the sand timer. This theme revolves around the AIS diagnosis and the uncertainty of the future that accompanied it. | Moderate confidence                    | No/Very minor concerns regarding methodological limitations, Minor concerns regarding coherence, Minor concerns regarding adequacy, and Minor concerns regarding relevance         | Motyer et al. 2021; Toye et al. 2016; Macculloch et al. 2009; Honeyman & Davison 2016; Williams et al. 2015;                                                                            |
| 2 | Normal activities no longer normal. This theme explores how activities and participation in everyday life were impacted.                          | Moderate confidence                    | No/Very minor concerns regarding methodological limitations, Minor concerns regarding coherence, Minor concerns regarding adequacy, and Minor concerns regarding relevance         | Motyer et al. 2021; Donnelly et al. 2004; Rullander et al. 2017; Rullander et al. 2013; Macculloch et al. 2009; Williams et al. 2015;                                                   |
| 3 | Hiding my body. This theme describes the struggle with self-image and hiding the body.                                                            | High confidence                        | No/Very minor concerns regarding methodological limitations, Minor concerns regarding coherence, No/Very minor concerns regarding adequacy, and Minor concerns regarding relevance | Law D et al. 2017; Motyer et al. 2021; Donnelly et al. 2004; Rullander et al. 2017; Toye et al. 2016; Sapountzi-Krepia et al. 2006; Rullander et al. 2013; Macculloch et al. 2009;      |
| 4 | I want to feel normal again. This theme explores the adolescents desire to return to normal.                                                      | High confidence                        | No/Very minor concerns regarding methodological limitations, No/Very minor concerns regarding coherence, Minor concerns regarding adequacy, and Minor concerns regarding relevance | Law D et al. 2017; Motyer et al. 2021; Donnelly et al. 2004; Rullander et al. 2017; Toye et al. 2016; Macculloch et al. 2009; Williams et al. 2015;                                     |
| 5 | Balancing isolation and support. This theme examines the relationships in the adolescents' lives.                                                 | Moderate confidence                    | No/Very minor concerns regarding methodological limitations, Minor concerns regarding coherence, Minor concerns regarding                                                          | Motyer et al. 2021; Donnelly et al. 2004; Toye et al. 2016; Sapountzi-Krepia et al. 2006; Rullander et al. 2013; Macculloch et al. 2009; Honeyman & Davison 2016; Williams et al. 2015; |

| # | Summarised review finding                                                                                                                       | GRADE-CERQual Assessment of confidence | Explanation of GRADE-CERQual Assessment                                                                                                                                    | References                                                                                                                                                                             |
|---|-------------------------------------------------------------------------------------------------------------------------------------------------|----------------------------------------|----------------------------------------------------------------------------------------------------------------------------------------------------------------------------|----------------------------------------------------------------------------------------------------------------------------------------------------------------------------------------|
|   |                                                                                                                                                 |                                        | adequacy, and Minor concerns regarding relevance                                                                                                                           |                                                                                                                                                                                        |
| 6 | Trying to keep control. This theme describes of the struggle to feel in control of decision-making following diagnosis.                         | Moderate confidence                    | No/Very minor concerns regarding methodological limitations, Minor concerns regarding coherence, Minor concerns regarding adequacy, and Minor concerns regarding relevance | Law D et al. 2017; Donnelly et al. 2004; Toye et al. 2016; Sapountzi-Krepia et al. 2006; Rullander et al. 2013; Macculloch et al. 2009; Honeyman & Davison 2016; Williams et al. 2015; |
| 7 | Fearing surgery yet feeling hopeful. This theme focused on the experience around spinal surgery and the beacon of hope it represented for some. | Moderate confidence                    | No/Very minor concerns regarding methodological limitations, Minor concerns regarding coherence, Minor concerns regarding adequacy, and Minor concerns regarding relevance | Motyer et al. 2021; Donnelly et al. 2004; Rullander et al. 2017; Toye et al. 2016; Rullander et al. 2013; Macculloch et al. 2009; Honeyman & Davison 2016; Williams et al. 2015;       |

## Evidence Profile Table

| # | Summarised review finding                                                                                                                         | Methodological limitations                                                                                                      | Coherence                                                                                                                                         | Adequacy                                                                                                                                           | Relevance                                                                                                                                                                           | GRADE-CERQual assessment of confidence                                                                                                                                                                                    | References                                                                                                                            |
|---|---------------------------------------------------------------------------------------------------------------------------------------------------|---------------------------------------------------------------------------------------------------------------------------------|---------------------------------------------------------------------------------------------------------------------------------------------------|----------------------------------------------------------------------------------------------------------------------------------------------------|-------------------------------------------------------------------------------------------------------------------------------------------------------------------------------------|---------------------------------------------------------------------------------------------------------------------------------------------------------------------------------------------------------------------------|---------------------------------------------------------------------------------------------------------------------------------------|
| 1 | Diagnosis of scoliosis turned the sand timer. This theme revolves around the AIS diagnosis and the uncertainty of the future that accompanied it. | No/Very minor concerns<br><br><b>Explanation:</b> No studies have more than one CASP category that was not explicitly reported. | Minor concerns<br><br><b>Explanation:</b> Minor concerns regarding coherence because of the varying primary data fitting with the review finding. | Minor concerns<br><br><b>Explanation:</b> Minor concerns regarding adequacy because there were only 5 studies contributing to this review finding. | Minor concerns<br><br><b>Explanation:</b> Minor concerns regarding relevance because the studies included were from UK, Canada and Ireland where the diagnostic process may differ. | Moderate confidence<br><br><b>Explanation:</b> No/Very minor concerns regarding methodological limitations, Minor concerns regarding coherence, Minor concerns regarding adequacy, and Minor concerns regarding relevance | Honeyman & Davison 2016; Macculloch et al. 2009; Motyer et al. 2021; Toye et al. 2016; Williams et al. 2015;                          |
| 2 | Normal activities no longer normal. This theme explores how activities and participation in everyday life were impacted.                          | No/Very minor concerns<br><br><b>Explanation:</b> No studies have more than one CASP category that was not explicitly reported. | Minor concerns<br><br><b>Explanation:</b> Minor concerns regarding coherence because of the varying primary data fitting with the review finding. | Minor concerns<br><br><b>Explanation:</b> Minor concerns regarding adequacy because only 6 studies discussed this review finding.                  | Minor concerns<br><br><b>Explanation:</b> Minor concerns regarding relevance because only Western countries are included in this theme.                                             | Moderate confidence<br><br><b>Explanation:</b> No/Very minor concerns regarding methodological limitations, Minor concerns regarding coherence, Minor concerns regarding adequacy, and                                    | Donnelly et al. 2004; Macculloch et al. 2009; Motyer et al. 2021; Rullander et al. 2013; Rullander et al. 2017; Williams et al. 2015; |

| # | Summarised review finding                                                                    | Methodological limitations                                                                                                      | Coherence                                                                                                                                                | Adequacy                                                                                                                                                      | Relevance                                                                                                                                                           | GRADE-CERQual assessment of confidence                                                                                                                                                                                        | References                                                                                                                                                                         |
|---|----------------------------------------------------------------------------------------------|---------------------------------------------------------------------------------------------------------------------------------|----------------------------------------------------------------------------------------------------------------------------------------------------------|---------------------------------------------------------------------------------------------------------------------------------------------------------------|---------------------------------------------------------------------------------------------------------------------------------------------------------------------|-------------------------------------------------------------------------------------------------------------------------------------------------------------------------------------------------------------------------------|------------------------------------------------------------------------------------------------------------------------------------------------------------------------------------|
|   |                                                                                              |                                                                                                                                 |                                                                                                                                                          |                                                                                                                                                               |                                                                                                                                                                     | Minor concerns regarding relevance                                                                                                                                                                                            |                                                                                                                                                                                    |
| 3 | Hiding my body. This theme describes the struggle with self-image and hiding the body.       | No/Very minor concerns<br><br><b>Explanation:</b> No studies have more than one CASP category that was not explicitly reported  | Minor concerns<br><br><b>Explanation:</b> Minor concerns regarding coherence because of the outlier data around the theme presented in a couple studies. | No/Very minor concerns<br><br><b>Explanation:</b> All studies with this theme provide rich data around this review finding.                                   | Minor concerns<br><br><b>Explanation:</b> Minor concerns regarding relevance because of the representation of the countries/cultures from these studies is limited. | High confidence<br><br><b>Explanation:</b> No/Very minor concerns regarding methodological limitations, Minor concerns regarding coherence, No/Very minor concerns regarding adequacy, and Minor concerns regarding relevance | Donnelly et al. 2004; Law D et al. 2017; Macculloch et al. 2009; Motyer et al. 2021; Rullander et al. 2013; Rullander et al. 2017; Sapountzi-Krepia et al. 2006; Toye et al. 2016; |
| 4 | I want to feel normal again. This theme explores the adolescents desire to return to normal. | No/Very minor concerns<br><br><b>Explanation:</b> No studies have more than one CASP category that was not explicitly reported. | No/Very minor concerns<br><br><b>Explanation:</b> The extracted data fit with this review finding.                                                       | Minor concerns<br><br><b>Explanation:</b> Minor concerns regarding adequacy because of the data and limited number of studies supporting this review finding. | Minor concerns<br><br><b>Explanation:</b> Minor concerns regarding relevance because of the representation of the countries/cultures from these studies is limited. | High confidence<br><br><b>Explanation:</b> No/Very minor concerns regarding methodological limitations, No/Very minor concerns regarding coherence,                                                                           | Donnelly et al. 2004; Law D et al. 2017; Macculloch et al. 2009; Motyer et al. 2021; Rullander et al. 2017; Toye et al. 2016; Williams et al. 2015;                                |

| # | Summarised review finding                                                                                               | Methodological limitations                                                                                                      | Coherence                                                                                                                                         | Adequacy                                                                                                                                                      | Relevance                                                                                                                            | GRADE-CERQual assessment of confidence                                                                                                                                                                                    | References                                                                                                                                                                              |
|---|-------------------------------------------------------------------------------------------------------------------------|---------------------------------------------------------------------------------------------------------------------------------|---------------------------------------------------------------------------------------------------------------------------------------------------|---------------------------------------------------------------------------------------------------------------------------------------------------------------|--------------------------------------------------------------------------------------------------------------------------------------|---------------------------------------------------------------------------------------------------------------------------------------------------------------------------------------------------------------------------|-----------------------------------------------------------------------------------------------------------------------------------------------------------------------------------------|
|   |                                                                                                                         |                                                                                                                                 |                                                                                                                                                   |                                                                                                                                                               |                                                                                                                                      | Minor concerns regarding adequacy, and Minor concerns regarding relevance                                                                                                                                                 |                                                                                                                                                                                         |
| 5 | Balancing isolation and support. This theme examines the relationships in the adolescents' lives.                       | No/Very minor concerns<br><br><b>Explanation:</b> No studies have more than one CASP category that was not explicitly reported. | Minor concerns<br><br><b>Explanation:</b> Minor concerns regarding coherence because of the varying primary data fitting with the review finding. | Minor concerns<br><br><b>Explanation:</b> Minor concerns regarding adequacy because of the data and limited number of studies supporting this review finding. | Minor concerns<br><br><b>Explanation:</b> Minor concerns regarding relevance because all studies come from Western countries.        | Moderate confidence<br><br><b>Explanation:</b> No/Very minor concerns regarding methodological limitations, Minor concerns regarding coherence, Minor concerns regarding adequacy, and Minor concerns regarding relevance | Donnelly et al. 2004; Honeyman & Davison 2016; Macculloch et al. 2009; Motyer et al. 2021; Rullander et al. 2013; Sapountzi-Krepia et al. 2006; Toye et al. 2016; Williams et al. 2015; |
| 6 | Trying to keep control. This theme describes of the struggle to feel in control of decision-making following diagnosis. | No/Very minor concerns<br><br><b>Explanation:</b> No studies have more than one CASP category that was not explicitly reported. | Minor concerns<br><br><b>Explanation:</b> Minor concerns regarding coherence because of the varying primary data                                  | Minor concerns<br><br><b>Explanation:</b> Minor concerns regarding adequacy because of the data and limited number of studies                                 | Minor concerns<br><br><b>Explanation:</b> Minor concerns regarding relevance because of the representation of the countries/cultures | Moderate confidence<br><br><b>Explanation:</b> No/Very minor concerns regarding methodological limitations, Minor concerns regarding                                                                                      | Donnelly et al. 2004; Honeyman & Davison 2016; Law D et al. 2017; Macculloch et al. 2009; Rullander et al. 2013; Sapountzi-Krepia et al. 2006; Toye et al. 2016;                        |

| # | Summarised review finding                                                                                                                       | Methodological limitations                                                                                                      | Coherence                                                                                                                                         | Adequacy                                                                                                                                                      | Relevance                                                                                                                                                           | GRADE-CERQual assessment of confidence                                                                                                                                                 | References                                                                                                                                                                       |
|---|-------------------------------------------------------------------------------------------------------------------------------------------------|---------------------------------------------------------------------------------------------------------------------------------|---------------------------------------------------------------------------------------------------------------------------------------------------|---------------------------------------------------------------------------------------------------------------------------------------------------------------|---------------------------------------------------------------------------------------------------------------------------------------------------------------------|----------------------------------------------------------------------------------------------------------------------------------------------------------------------------------------|----------------------------------------------------------------------------------------------------------------------------------------------------------------------------------|
|   |                                                                                                                                                 |                                                                                                                                 | fitting with the review finding.                                                                                                                  | supporting this review finding.                                                                                                                               | from these studies is limited.                                                                                                                                      | coherence, Minor concerns regarding adequacy, and Minor concerns regarding relevance                                                                                                   | Williams et al. 2015;                                                                                                                                                            |
| 7 | Fearing surgery yet feeling hopeful. This theme focused on the experience around spinal surgery and the beacon of hope it represented for some. | No/Very minor concerns<br><br><b>Explanation:</b> No studies have more than one CASP category that was not explicitly reported. | Minor concerns<br><br><b>Explanation:</b> Minor concerns regarding coherence because of the varying primary data fitting with the review finding. | Minor concerns<br><br><b>Explanation:</b> Minor concerns regarding adequacy because of the data and limited number of studies supporting this review finding. | Minor concerns<br><br><b>Explanation:</b> Minor concerns regarding relevance because of the representation of the countries/cultures from these studies is limited. | Moderate confidence<br><br><b>Explanation:</b> No/Very minor concerns regarding methodological limitations, Minor concerns regarding coherence, and Minor concerns regarding relevance | Donnelly et al. 2004; Honeyman & Davison 2016; Macculloch et al. 2009; Motyer et al. 2021; Rullander et al. 2013; Rullander et al. 2017; Toye et al. 2016; Williams et al. 2015; |
